# Supplementary material
Source: PubMed Central journal article supplement (PMC3117136)
Supplement: cc1008_1271SD3.pdf [file cc1008_1271SD3.pdf]

### Supplemental Table 3. Cellular Processes Increased in MCF7 Cells Treated with Lactate or Ketones.

| Data Set                                                                                                                                          | P-value  | Detailed Description                                                                                   |
|---------------------------------------------------------------------------------------------------------------------------------------------------|----------|--------------------------------------------------------------------------------------------------------|
| <b><u>1. Lactate-Specific Genes</u></b>                                                                                                           |          |                                                                                                        |
| <b><u>Stem Cells</u></b>                                                                                                                          |          |                                                                                                        |
| STEMCELL_NEURAL_UP                                                                                                                                | 1.31E-13 | Enriched in mouse neural stem cells, compared to differentiated brain                                  |
| STEMCELL_EMBRYONIC_UP                                                                                                                             | 3.60E-08 | Enriched in mouse embryonic stem cells, compared to differentiated brain and bone marrow cells         |
| <b><u>DNA Damage</u></b>                                                                                                                          |          |                                                                                                        |
| UVC_TTD_ALL_DN                                                                                                                                    | 2.83E-07 | Down-regulated at any timepoint following treatment of XPB/TTD fibroblasts with 3 J/m <sup>2</sup> UVC |
| UVC_XPCS_ALL_DN                                                                                                                                   | 7.98E-07 | Down-regulated at any timepoint following treatment of XPB/CS fibroblasts with 3 J/m <sup>2</sup> UVC  |
| UVC_XPCS_8HR_DN                                                                                                                                   | 1.94E-06 | Down-regulated at 8 hours following treatment of XPB/CS fibroblasts with 3 J/m <sup>2</sup> UVC        |
| UVC_TTD_4HR_DN                                                                                                                                    | 2.93E-06 | Down-regulated at 4 hours following treatment of XPB/TTD fibroblasts with 3 J/m <sup>2</sup> UVC       |
| UVC_TTD-XPCS_COMMON_DN<br>with 3 J/m <sup>2</sup> UVC                                                                                             | 4.98E-05 | Down-regulated at any timepoint following treatment of both XPB/CS and XPB/TTD fibroblasts             |
| UVC_HIGH_ALL_DN<br>a high dose (50 J/m <sup>2</sup> ) (clusters d1-d9)                                                                            | 1.24E-03 | Down-regulated at any timepoint following treatment of WS1 human skin fibroblasts with UVC at          |
| <b><u>Key Transcription Factors</u></b>                                                                                                           |          |                                                                                                        |
| MORF_HDAC2 219                                                                                                                                    | 3.11E-06 | Neighborhood of <b>HDAC2</b> histone deacetylase 2 in the MORF expression compendium                   |
| GGGAGGRR_V\$MAZ_Q6                                                                                                                                | 1.02E-04 | Genes with promoter regions [-2kb,2kb] around transcription start site containing the motif            |
| GGGAGGRR which matches annotation for <b>MAZ</b> : MYC-associated zinc finger protein (purine-binding transcription factor)                       |          |                                                                                                        |
| SCGGAAGY_V\$ELK1_Q2                                                                                                                               | 1.47E-04 | Genes with promoter regions [-2kb,2kb] around transcription start site containing the motif            |
| SCGGAAGY which matches annotation for <b>ELK1</b> : ELK1, member of ETS oncogene family                                                           |          |                                                                                                        |
| V\$E2F1_Q4_Q1                                                                                                                                     | 3.28E-04 | Genes with promoter regions [-2kb,2kb] around transcription start site containing the motif            |
| TTTSGCGSG which matches annotation for <b>E2F</b> <br>TFDP1: transcription factor Dp-1                                                            |          |                                                                                                        |
| TTGTTT_V\$FOXO4_Q1                                                                                                                                | 3.72E-04 | Genes with promoter regions [-2kb,2kb] around transcription start site containing the motif            |
| TTGTTT which matches annotation for <b>MLLT7</b> : myeloid/lymphoid or mixed-lineage leukemia (trithorax homolog, Drosophila); translocated to, 7 |          |                                                                                                        |
| GGGCGGR_V\$SP1_Q6                                                                                                                                 | 3.75E-04 | Genes with promoter regions [-2kb,2kb] around transcription start site containing the motif            |
| GGGCGGR which matches annotation for <b>SP1</b> : Sp1 transcription factor                                                                        |          |                                                                                                        |
| <b><u>Cancer Prognosis (Poor Survival)</u></b>                                                                                                    |          |                                                                                                        |
| MOREAUX_TACI_HI_VS_LOW_DN                                                                                                                         | 1.43E-04 | Genes overexpressed in TACI low patients (poor prognosis in multiple myeloma)                          |
| HCC_SURVIVAL_GOOD_VS_POOR_DN                                                                                                                      | 1.82E-04 | Genes highly expressed in hepatocellular carcinoma with poor survival.                                 |
| <b><u>2. Ketone-Specific Genes</u></b>                                                                                                            |          |                                                                                                        |
| <b><u>Stem Cells</u></b>                                                                                                                          |          |                                                                                                        |
| STEMCELL_HEMATOPOIETIC_UP                                                                                                                         | 7.49E-04 | Enriched in mouse hematopoietic stem cells, compared to differentiated brain and bone marrow           |
| <b><u>Key Transcription Factors</u></b>                                                                                                           |          |                                                                                                        |
| CAGGTG_V\$E12_Q6                                                                                                                                  | 7.97E-05 | Genes with promoter regions [-2kb,2kb] around transcription start site containing the motif            |
| CAGGTG which matches annotation for <b>TCF3</b> : transcription factor 3 (E2A immunoglobulin enhancer binding factors E12/E47)                    |          |                                                                                                        |

|                      |          |                                                                                                                                                                                                                    |
|----------------------|----------|--------------------------------------------------------------------------------------------------------------------------------------------------------------------------------------------------------------------|
| TGACAGNY_V\$MEIS1_01 | 3.33E-04 | Genes with promoter regions [-2kb,2kb] around transcription start site containing the motif TGACAGNY which matches annotation for <b>MEIS1</b> : Meis1, myeloid ecotropic viral integration site 1 homolog (mouse) |
| GGGTGGRR_V\$PAX4_03  | 4.16E-04 | Genes with promoter regions [-2kb,2kb] around transcription start site containing the motif GGGTGGRR which matches annotation for <b>PAX4</b> : paired box gene 4                                                  |
| MORF_ATF2_258        | 8.02E-04 | Neighborhood of ATF2 activating transcription factor 2 in the MORF expression compendium                                                                                                                           |

### **3. Common Intersecting Genes (Upregulated by both Lactate and Ketones)**

#### **DNA Damage**

|                                                       |          |                                                                                                        |
|-------------------------------------------------------|----------|--------------------------------------------------------------------------------------------------------|
| UVC_XPCS_ALL_DN                                       | 2.60E-13 | Down-regulated at any timepoint following treatment of XPB/CS fibroblasts with 3 J/m <sup>2</sup> UVC  |
| UVC_XPCS_8HR_DN                                       | 7.33E-12 | Down-regulated at 8 hours following treatment of XPB/CS fibroblasts with 3 J/m <sup>2</sup> UVC        |
| UVC_TTD_ALL_DN                                        | 2.47E-08 | Down-regulated at any timepoint following treatment of XPB/TTD fibroblasts with 3 J/m <sup>2</sup> UVC |
| UVC_XPCS_4HR_DN                                       | 3.21E-07 | Down-regulated at 4 hours following treatment of XPB/CS fibroblasts with 3 J/m <sup>2</sup> UVC        |
| UVC_TTD_4HR_DN                                        | 3.38E-07 | Down-regulated at 4 hours following treatment of XPB/TTD fibroblasts with 3 J/m <sup>2</sup> UVC       |
| UVB_NHEK1_DN                                          | 2.68E-06 | Downregulated by UV-B light in normal human epidermal keratinocytes                                    |
| UVC_TTD_8HR_DN                                        | 1.27E-05 | Down-regulated at 8 hours following treatment of XPB/TTD fibroblasts with 3 J/m <sup>2</sup> UVC       |
| UVC_TTD-XPCS_COMMON_DN<br>with 3 J/m <sup>2</sup> UVC | 6.54E-04 | Down-regulated at any timepoint following treatment of both XPB/CS and XPB/TTD fibroblasts             |
| UVB_NHEK3_C5                                          | 9.27E-04 | Regulated by UV-B light in normal human epidermal keratinocytes, cluster 5                             |

#### **Stem Cells**

|                           |          |                                                                                                |
|---------------------------|----------|------------------------------------------------------------------------------------------------|
| STEMCELL_EMBRYONIC_UP     | 7.26E-08 | Enriched in mouse embryonic stem cells, compared to differentiated brain and bone marrow cells |
| STEMCELL_NEURAL_UP        | 1.29E-07 | Enriched in mouse neural stem cells, compared to differentiated brain and bone marrow cells    |
| STEMCELL_HEMATOPOIETIC_UP | 2.93E-06 | Enriched in mouse hematopoietic stem cells, compared to differentiated brain and bone marrow   |

#### **Key Transcription Factors**

|                      |          |                                                                                                                                                                                                                                              |
|----------------------|----------|----------------------------------------------------------------------------------------------------------------------------------------------------------------------------------------------------------------------------------------------|
| GGGCGGR_V\$SP1_Q6    | 1.16E-07 | Genes with promoter regions [-2kb,2kb] around transcription start site containing the motif GGGCGGR which matches annotation for <b>SP1</b> : Sp1 transcription factor                                                                       |
| CAGGTG_V\$E12_Q6     | 1.30E-06 | Genes with promoter regions [-2kb,2kb] around transcription start site containing the motif CAGGTG which matches annotation for <b>TCF3</b> : transcription factor 3 (E2A immunoglobulin enhancer binding factors E12/E47)                   |
| TGGAAA_V\$NFAT_Q4_01 | 6.09E-06 | Genes with promoter regions [-2kb,2kb] around transcription start site containing the motif TGGAAA which matches annotation for <b>NFAT</b> <br> NFATC                                                                                       |
| CTTTGT_V\$LEF1_Q2    | 1.61E-05 | Genes with promoter regions [-2kb,2kb] around transcription start site containing the motif CTTTGT which matches annotation for <b>LEF1</b> : lymphoid enhancer-binding factor 1                                                             |
| TTGTTT_V\$FOXO4_01   | 7.86E-05 | Genes with promoter regions [-2kb,2kb] around transcription start site containing the motif TTGTTT which matches annotation for <b>MLL7</b> : myeloid/lymphoid or mixed-lineage leukemia (trithorax homolog, Drosophila); translocated to, 7 |

#### **Cancer Associated Genes**

|                    |          |                                                                                                                                                                              |
|--------------------|----------|------------------------------------------------------------------------------------------------------------------------------------------------------------------------------|
| BRCA_ER_NEG        | 3.48E-04 | Genes whose expression is consistently negatively correlated with estrogen receptor status in breast cancer - higher expression is associated with <b>ER-negative tumors</b> |
| BRCA_ER_POS        | 6.77E-04 | Genes whose expression is consistently positively correlated with estrogen receptor status in breast cancer - higher expression is associated with <b>ER-positive tumors</b> |
| BRENTANI_SIGNALING | 1.05E-03 | Cancer related genes involved in the cell signaling                                                                                                                          |
